# Supplementary material
Source: publisher figshare collection journal article supplement (https://aacr.figshare.com/articles/dataset/_/22528142)
Supplement: Supplementary file 1 [file 39991133]

## Supplementary Figure S3

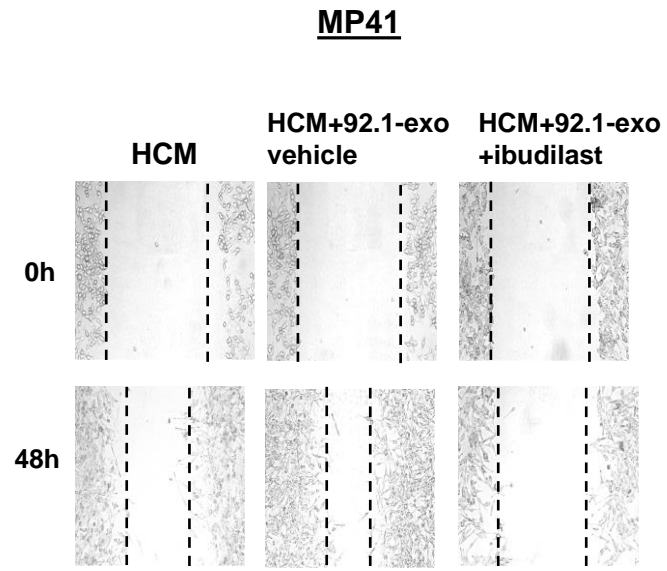

**Supplementaary Figure S3. Ibudilast inhibits wound healing of MP41 cells.** The scratched cells were incubated with control hepatocytes conditioned media (HCM) or with HCM exposed to 92.1-exo with or without 25 $\mu$ M ibudilast. Pictures were taken under a microscope at 10x magnification at zero time-point and after 48 hours.
